# Supplementary material for: A pectin-honey hydrogel prevents postoperative intraperitoneal adhesions in a rat model
Source: PubMed Central journal article supplement (PMC5314697; doi:10.1186/s12917-017-0965-z), 2017-02-17
Supplement: 12917_2017_965_MOESM1_ESM.pdf [file 12917_2017_965_MOESM1_ESM.pdf]

|                    | <b>Control</b> | <b>Treated</b> |
|--------------------|----------------|----------------|
| <b>Adhesion</b>    | 17             | 5              |
| <b>No adhesion</b> | 7              | 19             |

**Adhesions scoring**

| <b>Control</b> | <b>Treated</b> |
|----------------|----------------|
| 0              | 0              |
| 0              | 0              |
| 0              | 0              |
| 0              | 0              |
| 0              | 0              |
| 0              | 0              |
| 0              | 0              |
| 2              | 0              |
| 2              | 0              |
| 2              | 0              |
| 2              | 0              |
| 2              | 0              |
| 2              | 0              |
| 2              | 0              |
| 2              | 0              |
| 2              | 0              |
| 2              | 0              |
| 2              | 0              |
| 2              | 0              |
| 2              | 0              |
| 2              | 1              |
| 2              | 2              |
| 2              | 2              |
| 2              | 2              |
| 3              | 2              |



**Grades of fibrosis**

| <b>Control</b> | <b>Treated</b> |
|----------------|----------------|
| 0              | 0              |
| 0              | 0              |
| 0              | 0              |
| 0              | 0              |
| 0              | 0              |
| 0              | 0              |
| 1              | 0              |
| 1              | 0              |
| 1              | 0              |
| 1              | 0              |
| 1              | 0              |
| 1              | 0              |
| 2              | 0              |
| 2              | 0              |
| 2              | 0              |
| 2              | 0              |
| 2              | 0              |
| 2              | 0              |
| 2              | 1              |
| 3              | 1              |
| 3              | 1              |
| 3              | 3              |
| 3              | 3              |
| 3              | 3              |

**Grades of inflammation**

| <b>Control</b> | <b>Treated</b> |
|----------------|----------------|
| 0              | 0              |
| 0              | 0              |
| 0              | 0              |
| 0              | 0              |
| 0              | 0              |
| 0              | 0              |
| 0              | 0              |
| 0              | 0              |
| 0              | 0              |
| 0              | 0              |
| 1              | 0              |
| 1              | 0              |
| 1              | 0              |
| 1              | 0              |
| 1              | 0              |
| 1              | 0              |
| 1              | 0              |
| 1              | 0              |
| 1              | 0              |
| 2              | 0              |
| 2              | 0              |
| 2              | 0              |
| 2              | 3              |
| 3              | 3              |
| 3              | 3              |

### Grades of Neovascularization

| Control | Treated |
|---------|---------|
| 0       | 0       |
| 0       | 0       |
| 0       | 0       |
| 0       | 0       |
| 0       | 0       |
| 0       | 0       |
| 0       | 0       |
| 0       | 0       |
| 2       | 0       |
| 2       | 0       |
| 2       | 0       |
| 3       | 0       |
| 3       | 0       |
| 3       | 0       |
| 3       | 0       |
| 3       | 0       |
| 3       | 0       |
| 3       | 0       |
| 3       | 0       |
| 3       | 0       |
| 3       | 2       |
| 3       | 3       |
| 3       | 3       |
| 3       | 3       |
| 3       | 3       |
